# Supplementary material for: Smooth CH3NH3PbI3from controlled solid–gas reaction for photovoltaic applications
Source: Royal Society of Chemistry journal article supplement (doi:10.1039/c5ra12530h), 2015-01-01
Supplement: c5ra12530h1.pdf [file c5ra12530h1.pdf]

## Supplementary Information

### Smooth $\text{CH}_3\text{NH}_3\text{PbI}_3$ from controlled solid-gas reaction for photovoltaic applications

Jian Mao,<sup>a</sup> Hong Zhang,<sup>a</sup> Hexiang He,<sup>b</sup> Haifei Lu,<sup>a</sup> Fengxian Xie,<sup>a</sup> Di Zhang,<sup>a</sup> Kam Sing Wong,<sup>b</sup> and Wallace C. H. Choy<sup>a</sup>

<sup>a</sup> Department of Electrical and Electronic Engineering, The University of Hong Kong, Pok Fu Lam Road, Hong Kong, China. E-mail: [chchoy@eee.hku.hk](mailto:chchoy@eee.hku.hk)

<sup>b</sup> Department of Physics, The Hong Kong University of Science & Technology, Clear Water Bay, Kowloon, Hong Kong, China.

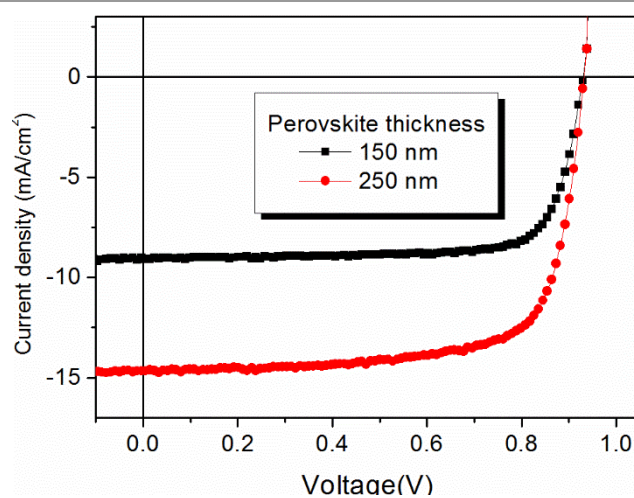

S11. J-V curves of perovskite solar cells with active layer thickness of 150 nm and 250nm.

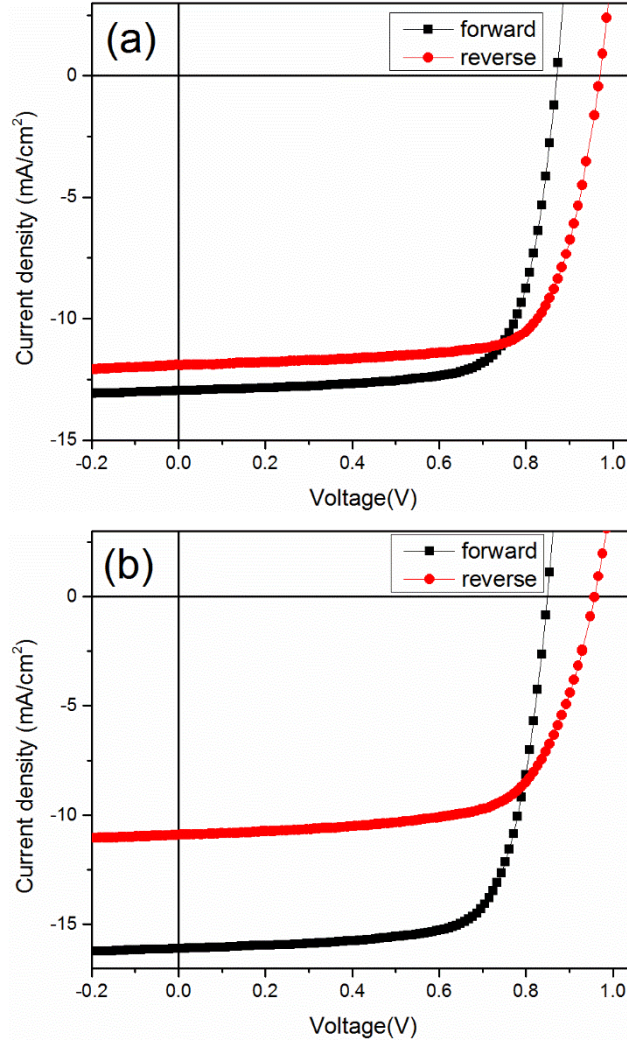

S12. J-V curve of 250nm perovskite from  $\text{CH}_3\text{NH}_3\text{I}$  evaporation rate of 0.9  $\text{\AA}/\text{s}$  (a) and 1.3  $\text{\AA}/\text{s}$  (b).

We propose that the hysteresis in perovskite solar cells from MAI evaporation rate of 0.9  $\text{\AA}/\text{s}$  and 1.3  $\text{\AA}/\text{s}$  might be movement of defect, such as MA interstitial, I interstitial, and Pb vacancy. These defects are reported with low formation energy<sup>1</sup> and are easy to form. Higher evaporation rate of MAI leads to faster reaction between MAI and  $\text{PbI}_2$  and quick crystallization of formed perovskite. The quick crystallization results in imperfect perovskite crystal with defects. The charged defects move to the interface between perovskite and carrier transporting layer under bias. The accumulated defects at interface result in built-in potential opposite to external bias and thus contribute to hysteresis in perovskite solar cells. However, when the reaction between MAI and  $\text{PbI}_2$  is low, the crystallization of perovskite is slow, resulting in minimal defects. Accordingly, the hysteresis is not obvious.

1. W. J. Yin, T. T. Shi and Y. F. Yan, *Appl. Phys. Lett.*, 2014, **104**, 063903.
